# Supplementary material
Source: PubMed Central journal article supplement (PMC11299864)
Supplement: NIHMS1939838-supplement-Supplemental_File_1.pdf [file NIHMS1939838-supplement-Supplemental_File_1.pdf]

## MOVeIT-14 – Parent Report

Please answer the questions below by circling your response. Some of the questions may sound similar, but please answer each the best you can.

|            |                                                                                                                                                                                                       |              |                  |              |
|------------|-------------------------------------------------------------------------------------------------------------------------------------------------------------------------------------------------------|--------------|------------------|--------------|
| <b>a</b>   | My child makes the same twitches, movements, noises, words or sounds over and over                                                                                                                    | <b>Never</b> | <b>Sometimes</b> | <b>Often</b> |
| <b>b</b>   | My child feels like they have to make a noise or say a word even if they don't want to                                                                                                                | <b>Never</b> | <b>Sometimes</b> | <b>Often</b> |
| <b>c</b>   | My child makes the same movements over and over that are hard to keep from doing                                                                                                                      | <b>Never</b> | <b>Sometimes</b> | <b>Often</b> |
| <b>d</b>   | My child feels like they have to move parts of their body even if they don't want to - like constant blinking, twitching the nose, moving mouth or jaw, shrugging the shoulders, jerking arms or legs | <b>Never</b> | <b>Sometimes</b> | <b>Often</b> |
| <b>e</b>   | My child feels like they have to make a noise or say a word, <b>or</b> move parts of my body even if they don't want to                                                                               | <b>Never</b> | <b>Sometimes</b> | <b>Often</b> |
| <b>f *</b> | My child sniffs (or snorts or clears their throat) a lot even if they don't have a cold or allergies                                                                                                  | <b>Never</b> | <b>Sometimes</b> | <b>Often</b> |
| <b>g</b>   | My child makes the same twitches, movements, noises, words or sounds over and over that are hard to keep from doing – like grunts, coughs, blinking, shrugging the shoulders                          | <b>Never</b> | <b>Sometimes</b> | <b>Often</b> |

**Please finish all questions on this page. When you have finished, please turn over and complete the questions on the other side.**

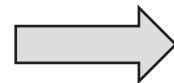

[preliminary version only (currently under revision); not for general use]

*\*Note, Parent MOVeIT-10 excludes above items: f, i, l, n*

|            |                                                                                                                                                                                 |              |                  |              |
|------------|---------------------------------------------------------------------------------------------------------------------------------------------------------------------------------|--------------|------------------|--------------|
| <b>h</b>   | My child has the same jerk or twitch over and over – like constant blinking, twitching the nose, moving mouth or jaw, shrugging the shoulders, jerking arms or legs             | <b>Never</b> | <b>Sometimes</b> | <b>Often</b> |
| <b>i *</b> | My child feels like they have to move parts of their body even if they don't want to                                                                                            | <b>Never</b> | <b>Sometimes</b> | <b>Often</b> |
| <b>j</b>   | My child makes the same twitches, movements, noises, words or sounds over and over - like grunts, coughs, blinking, shrugging shoulders                                         | <b>Never</b> | <b>Sometimes</b> | <b>Often</b> |
| <b>k</b>   | My child makes the same noises or words over and over                                                                                                                           | <b>Never</b> | <b>Sometimes</b> | <b>Often</b> |
| <b>l *</b> | My child feels like they have to make a noise or say a word, <b>or</b> move parts of their body even if they don't want to – like grunts, coughs, blinking, shrugging shoulders | <b>Never</b> | <b>Sometimes</b> | <b>Often</b> |
| <b>m</b>   | My child makes the same noises or sounds over and over that are hard to keep from doing                                                                                         | <b>Never</b> | <b>Sometimes</b> | <b>Often</b> |
| <b>n *</b> | My child feels like they have to make a noise or say a word even if they don't want to – like coughing, sniffing, grunting, or making animal sounds                             | <b>Never</b> | <b>Sometimes</b> | <b>Often</b> |

**Thank you!**

**[preliminary version only (currently under revision); not for general use]**

*\*Note, Parent MOVEIT-10 excludes above items: f, i, l, n*
